# Supplementary material for: Low molecular weight chitosan oligosaccharides (LMW-COSs) prevent obesity-related metabolic abnormalities in association with the modification of gut microbiota in high-fat diet (HFD)-fed mice
Source: Royal Society of Chemistry journal article supplement (doi:10.1039/d0fo01871f), 2020-01-01
Supplement: d0fo01871f1.pdf [file d0fo01871f1.pdf]

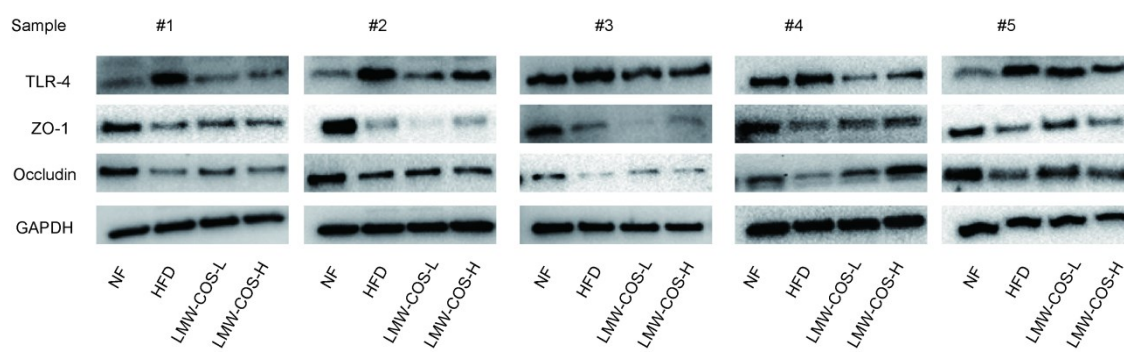

**Figure S1.** The protein expressing level of TLR4, ZO-1 and occludin in colon tissue were assessed using Western blot.

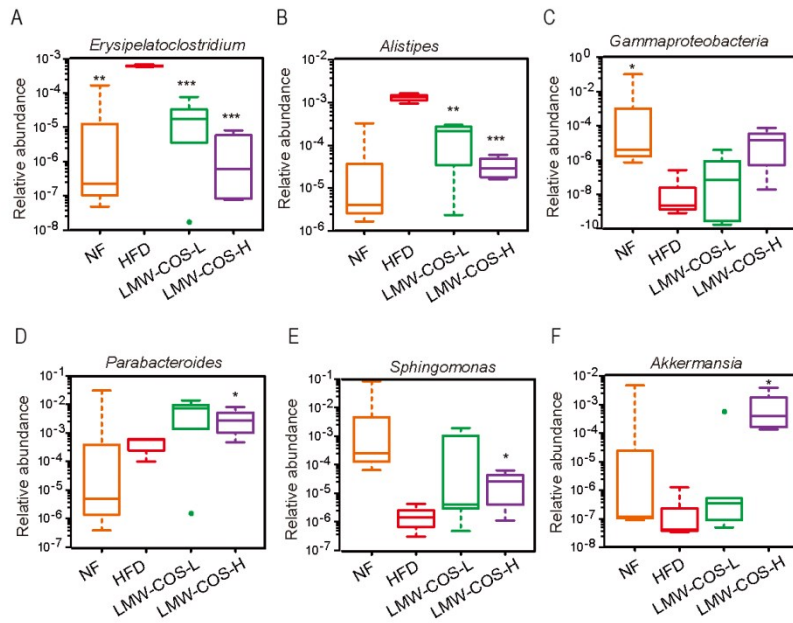

**Figure S2. Effects of LMW-COSs on the relative abundance of gut microbial community at genus level in HFD-fed mice, including (A) *Akkermansia*, (B) *Sphingomonas*, (C) *Gammaproteobacteria* (D) *Parabacteroides*, (E) *Erysipelatoclostridium*, (F) *Alistipes*. \* $P < 0.05$ , \*\* $P < 0.01$ , \*\*\* $P < 0.001$  compared to the HFD group.**

**Table S1. The primers sequences used for PCR reaction.**

| <b>Gene name</b> | <b>Primers sequences</b>                                                         |
|------------------|----------------------------------------------------------------------------------|
| TNF- $\alpha$    | Forward: 5'-TAGCCAGGAGGGAGAACAGA-3'<br>Reverse: 5'-TTTTCTGGAGGGAGATGTGG-3'       |
| IL-1 $\beta$     | Forward: 5'-TTGAAGAAGAGCCCATCCTC -3'<br>Reverse: 5'-CAGCTCATATGGGTCCGAC -3'      |
| IL-6             | Forward: 5'-CCGGAGAGGAGACTTCAC-3'<br>Reverse: 5'-TCCACGATTTCCAGAGA-3'            |
| IL-10            | Forward: 5'-GCTCTTACTGACTGGCATGAG -3'<br>Reverse: 5'-CGCAGCTCTAGGAGCATGTG-3'     |
| ZO-1             | Forward: 5'- GCCGCTAAGAGCACAGCAA-3'<br>Reverse: 5'- TCCCCACTCTGAAAATGAGGA-3'     |
| GAPDH            | Forward: 5'- AGGTCGGTGTGAACGGATTTG-3'<br>Reverse: 5'- TGTAGACCATGTAGTTGAGGTCA-3' |

**Table S2.** Serum lipid concentrations of mice fed normal fat (NF) diets, high fat (HFD), orlistat, LMW-COS-L and LMW-COS-H.

| Groups     | NF             | HFD          | ORL             | LMW-COS-L      | LMW-COS-H       |
|------------|----------------|--------------|-----------------|----------------|-----------------|
| TG (mM)    | 1.02 ± 0.06 *  | 1.39 ± 0.12  | 0.91 ± 0.06 *** | 0.93 ± 0.12 ** | 0.74 ± 0.08 *** |
| TC (mM)    | 7.96 ± 0.96 ** | 11.26 ± 0.77 | 8.23 ± 1.16 **  | 9.69 ± 0.45*   | 8.40 ± 0.44 **  |
| HDL-c (mM) | 4.47 ± 0.46**  | 7.44 ± 0.98  | 5.86 ± 0.42 *   | 5.87 ± 0.27*   | 5.38 ± 0.76 *   |
| LDL-c (mM) | 0.64 ± 0.08**  | 1.33 ± 0.27  | 0.89 ± 0.08 *   | 0.97 ± 0.10    | 0.88 ± 0.10 *   |
| FFA (mM)   | 0.59 ± 0.13 *  | 0.86 ± 0.16  | 0.59 ± 0.06 **  | 0.66 ± 0.20    | 0.54 ± 0.10 *   |

Results are expressed as mean ± SD (n = 6), \*  $P < 0.05$  versus HFD group; \*\*  $P < 0.01$  versus HFD group.
